# Supplementary material for: An evaluation of Monte Carlo-based hyper-heuristic for interaction testing of industrial embedded software applications
Source: Springer Nature journal article supplement (doi:10.1007/s00500-020-04769-z), 2020-02-25
Supplement: MOESM1 [file 17742696]

| Case Study                   | Q-EMCQ       |              |              | EMCQ   |         |              | TLBO   |              |               | SCA    |         |               | SOS    |         |              |
|------------------------------|--------------|--------------|--------------|--------|---------|--------------|--------|--------------|---------------|--------|---------|---------------|--------|---------|--------------|
|                              | Ave MQ       | Best MQ      | Ave Time (s) | Ave MQ | Best MQ | Ave Time (s) | Ave MQ | Best MQ      | Ave Time (s)  | Ave MQ | Best MQ | Ave Time (s)  | Ave MQ | Best MQ | Ave Time (s) |
| Credit Card Payment System   | <b>2.031</b> | <b>2.226</b> | 40.876       | 1.976  | 2.171   | 39.016       | 1.999  | <b>2.226</b> | <b>33.531</b> | 1.957  | 2.078   | 36.953        | 1.983  | 2.117   | 45.080       |
| Unified Inventory University | <b>2.315</b> | <b>2.899</b> | 41.673       | 2.288  | 2.721   | 39.312       | 2.135  | 2.623        | 40.080        | 2.140  | 2.588   | <b>37.782</b> | 2.118  | 2.581   | 47.282       |
| Food Book                    | <b>3.430</b> | <b>4.465</b> | 63.530       | 3.018  | 4.076   | 58.850       | 3.012  | 3.741        | 68.130        | 2.991  | 3.551   | <b>56.798</b> | 2.881  | 3.305   | 68.250       |
