# Supplementary material for: An evaluation of Monte Carlo-based hyper-heuristic for interaction testing of industrial embedded software applications
Source: Springer Nature journal article supplement (doi:10.1007/s00500-020-04769-z), 2020-02-25
Supplement: MOESM2 [file 17742696]

Covering Array  
Construction

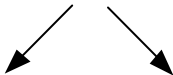

Mathematical  
Approach

Greedy  
Computational  
Approach

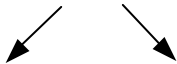

One-parameter-  
at-a-time Method

One-test-at-a  
time Method
